# Supplementary material
Source: PubMed Central journal article supplement (PMC6054875)
Supplement: NIHMS77479-supplement-Supplementary_tables.pdf [file NIHMS77479-supplement-Supplementary_tables.pdf]

## Supplementary Table 1

### Summary of the models for the subunits of mouse complex I

| Subunit          | Alternative names   | Chain | Total residues | Modeled residues | % Modeled | Notes                                                         |
|------------------|---------------------|-------|----------------|------------------|-----------|---------------------------------------------------------------|
| NDUFV1           | 51 kDa, Nqo1, NuoF  | F     | 444            | 10-437           | 96.4      | FMN, 4Fe4S                                                    |
| NDUFV2           | 24 kDa, Nqo2, NuoE  | E     | 217            | 5-216            | 97.7      | 2Fe2S                                                         |
| NDUFS1           | 75 kDa, Nqo3, NuoG  | G     | 704            | 6-693            | 97.7      | 2Fe2S, 2 x 4Fe4S                                              |
| NDUFS2           | 49 kDa, Nqo4, NuoCD | D     | 430            | 1-430            | 100       | Dimethyl-Arg85. No sidechains 40-42<br>Deactive: 52-60 absent |
| NDUFS3           | 30 kDa, Nqo5, NuoCD | C     | 228            | 8-213            | 90.4      |                                                               |
| NDUFS7           | PSST, Nqo6, NuoB    | B     | 189            | 35-189           | 82.0      | 4Fe4S                                                         |
| NDUFS8           | TYKY, Nqo9, Nuol    | I     | 178            | 1-178            | 100       | No side-chains 8-14, 2 x 4Fe4S                                |
| ND1              | Nqo8, NuoH          | H     | 318            | 1-318            | 100       | N-formyl. Deactive: 204-215 absent                            |
| ND2              | Nqo14, NuoN         | N     | 345            | 1-344            | 99.7      | N-formyl                                                      |
| ND3              | Nqo7, NuoA          | A     | 115            | 1-115            | 100       | N-formyl. Deactive: 28-48 absent                              |
| ND4              | Nqo13, NuoM         | M     | 459            | 1-459            | 100       | N-formyl                                                      |
| ND4L             | Nqo11, NuoK         | K     | 98             | 1-98             | 100       | N-formyl                                                      |
| ND5              | Nqo12, NuoL         | L     | 607            | 1-606            | 99.8      | N-formyl                                                      |
| ND6              | Nqo10, NuoJ         | J     | 172            | 1-171            | 99.4      | N-formyl<br>Deactive: no sidechains 84-118                    |
| NDUFV3           | 10 kDa              | s     | 69             | 29-68            | 58.0      |                                                               |
| NDUFS4           | 18 kDa              | Q     | 133            | 9-133            | 94.0      |                                                               |
| NDUFS5           | 15 kDa              | e     | 105            | 1-104            | 99.0      | 2 x Cys-Cys                                                   |
| NDUFS6           | 13 kDa              | R     | 96             | 1-95             | 99.0      | Zn <sup>2+</sup>                                              |
| NDUFA1           | MWFE                | a     | 70             | 1-67             | 95.7      |                                                               |
| NDUFA2           | B8                  | S     | 98             | 13-95            | 84.7      |                                                               |
| NDUFA3           | B9                  | b     | 83             | 1-83             | 100       | N-acetyl                                                      |
| NDUFA5           | B13                 | V     | 115            | 4-115            | 97.4      |                                                               |
| NDUFA6           | B14                 | W     | 130            | 17-130           | 87.7      |                                                               |
| NDUFA7           | B14.5a              | r     | 112            | 1-76, 90-122     | 89.3      | N-acetyl                                                      |
| NDUFA8           | PGIV                | X     | 171            | 1-171            | 100       | 4 x Cys-Cys                                                   |
| NDUFA9           | 39 kDa              | P     | 342            | 1-342            | 100       | Deactive: 186-196, 251-278, 324-335 absent,<br>NADPH          |
| NDUFA10          | 42 kDa              | O     | 320            | 1-320            | 100       | ADP                                                           |
| NDUFA11          | B14.7               | Y     | 140            | 1-140            | 100       | Cys-Cys                                                       |
| NDUFA12          | B17.2               | q     | 145            | 1-144            | 99.3      | N-acetyl                                                      |
| NDUFA13          | B16.6               | Z     | 143            | 5-143            | 97.2      |                                                               |
| NDUFAB1 $\alpha$ | SDAP $\alpha$       | T     | 88             | 8-82             | 85.2      | 4'-phosphopantethine + 3-hydroxyundecanoate                   |
| NDUFAB1 $\beta$  | SDAP $\beta$        | U     | 88             | 1-88             | 100       | 4'-phosphopantethine + 3-hydroxydodecanoate                   |
| NDUFB1           | MNLL                | f     | 56             | 4-54             | 91.1      |                                                               |
| NDUFB2           | AGGG                | j     | 72             | 6-65             | 83.3      |                                                               |
| NDUFB3           | B12                 | k     | 103            | 20-91            | 69.9      |                                                               |
| NDUFB4           | B15                 | m     | 128            | 5-128            | 96.9      |                                                               |
| NDUFB5           | SGDH                | h     | 143            | 6-142            | 95.8      |                                                               |
| NDUFB6           | B17                 | i     | 127            | 1-35, 62-127     | 79.5      | N-acetyl. No sidechains 62-65, 124-126. 36-61<br>absent       |
| NDUFB7           | B18                 | o     | 136            | 12-116           | 77.2      | 2 x Cys-Cys                                                   |
| NDUFB8           | ASHI                | l     | 157            | 3-154            | 96.8      |                                                               |
| NDUFB9           | B22                 | n     | 178            | 1-176            | 98.9      |                                                               |
| NDUFB10          | PDSW                | p     | 175            | 2-171            | 97.1      | 2 x Cys-Cys                                                   |
| NDUFB11          | ESSS                | g     | 122            | 21-121           | 82.7      |                                                               |
| NDUFC1           | KFYI                | c     | 49             | 2-48             | 95.9      |                                                               |
| NDUFC2           | B14.5b              | d     | 120            | 1-119            | 99.2      |                                                               |

## Supplementary Table 2

### The interfaces between subunits in the 3.3 Å structure of mouse complex I

| Subunit               | Surface area (Å <sup>2</sup> ) |        |    | Local Resolution (Å) | Subunit contacts in order of decreasing contact area          |                                                                                                     |
|-----------------------|--------------------------------|--------|----|----------------------|---------------------------------------------------------------|-----------------------------------------------------------------------------------------------------|
|                       | Total                          | Buried | %  |                      | Core subunits                                                 | Supernumerary subunits                                                                              |
| <b>NDUFV1</b>         | 18,800                         | 6,100  | 33 | 3.8 ± 0.3            | NDUFV2, NDUFS1                                                | NDUFV3, NDUFS4, NDUFA7                                                                              |
| <b>NDUFV2</b>         | 13,600                         | 4,900  | 36 | 3.9 ± 0.3            | NDUFV1, NDUFS1                                                | NDUFV3, NDUFS4, NDUFS6                                                                              |
| <b>NDUFS1</b>         | 28,500                         | 10,100 | 35 | 3.6 ± 0.3            | NDUFV1, NDUFS2, NDUFV2, NDUFS3, NDUFS8                        | NDUFS4, NDUFA2, NDUFA12, NDUFA6, NDUFA7, NDUFS6, NDUFA9, NDUFV3                                     |
| <b>NDUFS1 (small)</b> | 12,200                         | 7,100  | 58 | 3.5 ± 0.2            | (NDUFS1 large), NDUFV1, NDUFS2, NDUFV2, NDUFS3, NDUFS8        | NDUFS4, NDUFA7, NDUFS6, NDUFA12, NDUFV3                                                             |
| <b>NDUFS1 (large)</b> | 19,100                         | 5,600  | 30 | 3.7 ± 0.3            | NDUFS1 (small), NDUFS3, NDUFS8                                | NDUFA2, NDUFS4, NDUFA12, NDUFA6, NDUFA9, NDUFV3                                                     |
| <b>NDUFS2</b>         | 21,300                         | 14,400 | 68 | 3.4 ± 0.1            | NDUFS3, NDUFS8, NDUFS7, ND1, ND2, NDUFS1, ND3, ND4, ND4L, ND5 | NDUFA7, NDUFA13, NDUFA10, NDUFA5, NDUFS6, NDUFB11, NDUFA6, NDUFS4, NDUFA12                          |
| <b>NDUFS3</b>         | 14,500                         | 10,200 | 70 | 3.4 ± 0.1            | NDUFS2, NDUFS7, NDUFS1, NDUFS8, ND3                           | NDUFA5, NDUFS4, NDUFA7, NDUFA6, NDUFA9                                                              |
| <b>NDUFS7</b>         | 9,000                          | 6,300  | 70 | 3.4 ± 0.2            | NDUFS2, ND1, NDUFS8, NDUFS3, ND3                              | NDUFA9, NDUFA12, NDUFA6, NDUFA7, NDUFS4                                                             |
| <b>NDUFS8</b>         | 13,100                         | 9,600  | 73 | 3.4 ± 0.2            | NDUFS2, NDUFS7, ND1, NDUFS1, NDUFS3                           | NDUFA12, NDUFS6, NDUFA7, NDUFA13, NDUFA3, NDUFS4, NDUFA1, NDUFA9, NDUFA5                            |
| <b>ND1</b>            | 16,000                         | 10,700 | 67 | 3.5 ± 0.1            | ND3, NDUFS7, NDUFS2, ND6, NDUFS8                              | NDUFA1, NDUFA13, NDUFA3, NDUFA8, NDUFA9, NDUFA12, NDUFA7                                            |
| <b>ND2</b>            | 15,200                         | 9,800  | 65 | 3.5 ± 0.1            | ND4L, ND4, ND5, NDUFS2, ND6, ND3                              | NDUFA10, NDUFC2, NDUFS5, NDUFA11, NDUFB5, NDUFA8, NDUFB11                                           |
| <b>ND3</b>            | 11,000                         | 7,400  | 67 | 3.5 ± 0.1            | ND1, ND6, NDUFS2, NDUFS7, ND4L, ND2, NDUFS3                   | NDUFA3, NDUFA6, NDUFA9, NDUFA13, NDUFS5, NDUFA1                                                     |
| <b>ND4</b>            | 18,200                         | 11,000 | 60 | 3.4 ± 0.1            | ND5, ND2, NDUFS2                                              | NDUFB11, NDUFB4, NDUFB5, NDUFB1, NDUFB10, NDUFB8, NDUFB9, NDUFA8, NDUFC2, NDUFA11, NDUFA10          |
| <b>ND4L</b>           | 7,000                          | 5,700  | 83 | 3.5 ± 0.1            | ND6, ND2, ND5, ND3, NDUFS2                                    | NDUFS5                                                                                              |
| <b>ND5</b>            | 28,600                         | 13,900 | 49 | 3.6 ± 0.1            | ND4, ND2, ND4L, NDUFS2                                        | NDUFB8, NDUFB2, NDUFB9, NDUFB10, NDUFB6, NDUFB4, NDUFB7, NDUFB3, NDUFA11, NDUFAB1β, NDUFB5, NDUFB11 |
| <b>ND6</b>            | 13,000                         | 8,300  | 64 | 3.6 ± 0.2            | ND4L, ND3, ND1, ND2                                           | NDUFA13, NDUFS5, NDUFA1, NDUFA9, NDUFA3, NDUFA6                                                     |
| <b>NDUFS4</b>         | 10,800                         | 6,500  | 60 | 3.4 ± 0.1            | NDUFS1, NDUFS3, NDUFV1, NDUFS8, NDUFV2, NDUFS2, NDUFS7        | NDUFA6, NDUFA9, NDUFV3, NDUFA12, NDUFS6, NDUFA5                                                     |
| <b>NDUFS5</b>         | 9,600                          | 5,400  | 56 | 3.8 ± 0.4            | ND2, ND6, ND4L, ND3                                           | NDUFA13, NDUFB5, NDUFA8, NDUFC2, NDUFA1, NDUFA3                                                     |
| <b>NDUFS6</b>         | 7,500                          | 3,000  | 40 | 3.6 ± 0.2            | NDUFS8, NDUFS1, NDUFS2, NDUFV2                                | NDUFA9, NDUFA12, NDUFS4                                                                             |
| <b>NDUFA1</b>         | 6,200                          | 3,700  | 60 | 3.6 ± 0.2            | ND1, ND6, NDUFS8, ND3                                         | NDUFA8, NDUFA13, NDUFS5, NDUFA7, NDUFA12                                                            |
| <b>NDUFA2</b>         | 5,500                          | 1,400  | 25 | 4.0 ± 0.2            | NDUFS1                                                        | -                                                                                                   |
| <b>NDUFA3</b>         | 8,100                          | 3,300  | 41 | 3.9 ± 0.3            | ND1, ND3, NDUFS8                                              | NDUFA8, NDUFA13, NDUFS5, ND6, NDUFB5                                                                |
| <b>NDUFA5</b>         | 8,500                          | 2,900  | 34 | 3.7 ± 0.2            | NDUFS3, NDUFS2, NDUFS8                                        | NDUFA7, NDUFA10, NDUFS4, NDUFA6                                                                     |
| <b>NDUFA6</b>         | 9,300                          | 4,500  | 48 | 3.5 ± 0.1            | NDUFS3, NDUFS1, ND3, NDUFS2, NDUFS7, ND6                      | NDUFAB1α, NDUFS4, NDUFA9, NDUFA5                                                                    |
| <b>NDUFA7</b>         | 11,500                         | 6,000  | 52 | 3.6 ± 0.2            | NDUFS2, NDUFS3, NDUFS8, NDUFS1, NDUFV1, ND1, NDUFS7           | NDUFA12, NDUFA13, NDUFA5, NDUFA1                                                                    |
| <b>NDUFA8</b>         | 14,100                         | 6,500  | 46 | 3.9 ± 0.2            | ND2, ND4, ND1                                                 | NDUFA13, NDUFA3, NDUFA1, NDUFC2, NDUFB5, NDUFS5, NDUFC1, NDUFB1                                     |
| <b>NDUFA9</b>         | 17,000                         | 4,100  | 24 | 3.7 ± 0.3            | NDUFS7, NDUFS3, ND1, ND3, NDUFS1, ND6, NDUFS8                 | NDUFS6, NDUFA6, NDUFS4, NDUFA12                                                                     |
| <b>NDUFA10</b>        | 17,000                         | 3,900  | 23 | 3.7 ± 0.2            | ND2, NDUFS2, ND4                                              | NDUFC1, NDUFB11, NDUFC2, NDUFA5                                                                     |

|                                   |        |       |    |           |                                     |                                                                                                             |
|-----------------------------------|--------|-------|----|-----------|-------------------------------------|-------------------------------------------------------------------------------------------------------------|
| <b>NDUFA11</b>                    | 9,300  | 1,600 | 17 | 3.8 ± 0.2 | ND5, ND2, ND4, NDUFS2               | NDUFB5, NDUFB4                                                                                              |
| <b>NDUFA12</b>                    | 11,800 | 4,600 | 37 | 3.6 ± 0.2 | NDUFS8, NDUFS1, NDUFS7, ND1, NDUFS2 | NDUFS6, NDUFA7, NDUFS4, NDUFA9, NDUFA1                                                                      |
| <b>NDUFA13</b>                    | 14,000 | 8,200 | 59 | 3.8 ± 0.3 | ND3, NDUFS2, ND1, NDUFS8, ND6       | NDUFA1, NDUFA3, NDUFS5, NDUFB5, NDUFA7, NDUFA8                                                              |
| <b>NDUFAB1<math>\alpha</math></b> | 5,400  | 900   | 17 | 4.2 ± 0.4 | -                                   | NDUFA6                                                                                                      |
| <b>NDUFAB1<math>\beta</math></b>  | 6,300  | 3,300 | 53 | 3.9 ± 0.3 | ND5                                 | NDUFB9, NDUFB3, NDUFB6, NDUFB2, NDUFB8, NDUFB5                                                              |
| <b>NDUFB1</b>                     | 5,600  | 1,700 | 31 | 3.9 ± 0.2 | ND4                                 | NDUFB5, NDUFB10, NDUFA8, NDUFC2                                                                             |
| <b>NDUFB2</b>                     | 6,700  | 3,200 | 48 | 4.1 ± 0.4 | ND5                                 | NDUFB3, NDUFB7, NDUFB1 $\beta$ , NDUFB8, NDUFB6                                                             |
| <b>NDUFB3</b>                     | 7,000  | 2,800 | 39 | 4.1 ± 0.3 | ND5                                 | NDUFB2, NDUFB9, NDUFB1 $\beta$                                                                              |
| <b>NDUFB4</b>                     | 12,600 | 5,900 | 47 | 3.7 ± 0.2 | ND4, ND5                            | NDUFB8, NDUFB9, NDUFB10, NDUFB11, NDUFC2, NDUFA11                                                           |
| <b>NDUFB5</b>                     | 13,700 | 7,700 | 56 | 3.7 ± 0.2 | ND4, ND2, ND5                       | NDUFB10, NDUFS5, NDUFB11, NDUFC2, NDUFB1, NDUFA8, NDUFB9, NDUFB6, NDUFA11, NDUFA13, NDUFB1 $\beta$ , NDUFA3 |
| <b>NDUFB6</b>                     | 10,700 | 5,000 | 47 | 4.0 ± 0.3 | ND5                                 | NDUFB10, NDUFB9, NDUFB7, NDUFB1 $\beta$ , NDUFB5, NDUFB2, NDUFB11                                           |
| <b>NDUFB7</b>                     | 9,500  | 3,900 | 41 | 4.3 ± 0.5 | ND5                                 | NDUFB8, NDUFB6, NDUFB2, NDUFB10                                                                             |
| <b>NDUFB8</b>                     | 13,200 | 5,500 | 42 | 3.7 ± 0.3 | ND5, ND4                            | NDUFB4, NDUFB7, NDUFB9, NDUFB10, NDUFB1 $\beta$ , NDUFB2                                                    |
| <b>NDUFB9</b>                     | 15,300 | 7,100 | 47 | 3.9 ± 0.3 | ND5, ND4                            | NDUFB1 $\beta$ , NDUFB4, NDUFB6, NDUFB3, NDUFB5, NDUFB8, NDUFB11                                            |
| <b>NDUFB10</b>                    | 15,400 | 8,000 | 52 | 3.8 ± 0.2 | ND5, ND4                            | NDUFB11, NDUFB6, NDUFB5, NDUFC2, NDUFB7, NDUFB4, NDUFB1, NDUFB8                                             |
| <b>NDUFB11</b>                    | 10,500 | 5,300 | 51 | 3.7 ± 0.2 | ND4, NDUFS2, ND5, ND2,              | NDUFB10, NDUFB5, NDUFA10, NDUFC2, NDUFB9, NDUFB4, NDUFB6                                                    |
| <b>NDUFC1</b>                     | 5,100  | 1,500 | 29 | 4.0 ± 0.3 | -                                   | NDUFC2, NDUFA10, NDUFA8                                                                                     |
| <b>NDUFC2</b>                     | 10,500 | 4,900 | 47 | 3.7 ± 0.2 | ND2, ND4                            | NDUFC1, NDUFB5, NDUFB10, NDUFA8, NDUFA10, NDUFS5, NDUFB11, NDUFB4, NDUFB1                                   |
| <b>NDUFV3</b>                     | 4,800  | 2,600 | 53 | 3.9 ± 0.3 | NDUFV1, NDUFV2, NDUFS1              | NDUFS4                                                                                                      |

Surface areas of contacts between subunits were calculated using the PDBePISA server (<http://www.ebi.ac.uk/pdbe/pisa/>) and reported to 100 Å<sup>2</sup> accuracy. Local resolutions were estimated using the Local Resolution function in RELION with default parameters, then UCSF Chimera was used to extract the resolution at each atomic coordinate in each subunit and the values were averaged.

## Supplementary Table 3

### Phospholipids modeled in the structure of active mouse complex I

| Phospholipid in mouse | Confidence | Side   | Location                                                                                                    | Human PDB (5XTD) | Ovine PDB (5LNK) | Porcine PDB (5GUP) |
|-----------------------|------------|--------|-------------------------------------------------------------------------------------------------------------|------------------|------------------|--------------------|
| H-401 3PE             | 1          | IMS    | Interface of ND1, ND3-TMH1 and ND6 (also loops of NDUFA1 and NDUFA13 in IMS).                               | PE               | PE               | PE                 |
| H-402 PC1             | 2          | Matrix | Interface of ND1 and ND6 (also loops in C-terminal domain of NDUFA9).                                       | -                | -                | -                  |
| A-201 3PE             | 2          | Matrix | Interface of ND4L and ND6 (also C-terminal TMH of ND5).                                                     | -                | -                | -                  |
| N-401 3PE             | 2          | Matrix | Interface of ND2, NDUFA11 and transverse and final TMH of ND5.                                              | CDL              | -                | CDL                |
| M-501 3PE             | 1          | Matrix | Interface of ND2, ND4 and ND5 transverse helix (also N-terminus of NDUFS2). See also M-502.                 | PE               | -                | PE                 |
| M-502 3PE             | 2          | IMS    | Interface of ND2, ND4 and NDUFA11. See also M501.                                                           | PE               | -                | PE                 |
| L-701 3PE             | 1          | Matrix | Interface of ND4 and ND5 and ND5 transverse helix (also loops and TMH of NDUFB8).                           | PE               | -                | PE                 |
| L-702 CDL             | 1          | Matrix | Interface of ND4, ND5 and NDUFB5 (also NDUFB11). See also L-703, M-503, L-704.                              | CDL              | CDL              | CDL                |
| L-703 CDL             | 2          | IMS    | Interface of ND4, ND5, NDUFB5, NDUFB6 and NDUFB11 (also NDUFB10 on IMS face). See also L-702, M-503, L-704. | CDL              | CDL              | -                  |
| M-503 3PE             | 1          | IMS    | Interface of ND4, ND5 and NDUFB11. See also L-702, L-703, L-704.                                            | PC               | (CDL)            | -                  |
| L-704 3PE             | 1          | IMS    | Interface of ND5, NDUFB5 and NDUFB6. See also L-702, L-703, M-503.                                          | -                | -                | -                  |
| M-504 3PE             | 2          | IMS    | Interface of ND4, NDUFB1 and NDUFB11 (also NDUFB5 on IMS face).                                             | -                | -                | -                  |
| M-505 3PE             | 2          | Matrix | Interface of ND2, ND4 and NDUFC2 (also C-terminal helix of NDUFA10). See also M-506, M-507.                 | CDL              | -                | CDL                |
| M-506 3PE             | 2          | Matrix | Interface of ND2, ND4 and NDUFC2 (also NDUFB1 and C-terminal loop of NDUFA10). See also M-505, M-507.       |                  | (PE)             |                    |
| M-507 CDL             | 1          | IMS    | Interface of ND2, ND4, NDUFB1 and NDUFC2 (also C-terminus of NDUFA8 on IMS face). See also M-505, M-506.    | CDL              | PC               | CDL                |
| H-403 3PE             | 1          | Matrix | Interface of ND1, NDUFA3 and NDUFA13 (also helix in NDUFS2 and N-terminus of NDUFS8). See also H-404.       | PC               | PE               | PC                 |
| H-404 PC1             | 1          | Matrix | Interface of ND1 and NDUFA13 (also helices of NDUFS8 N-terminus and NDUFA7). See also H-403.                | -                | -                | -                  |
| H-405 CDL             | 1          | Matrix | Interface of NDUFA1 and helix of NDUFA12 (also ND1, NDUFS8 and NDUFA7).                                     | -                | CDL              | -                  |
| H-406 PC1             | 2          | Matrix | Interface of helices on ND1, NDUFS7 and NDUFA12 (also NDUFS8).                                              | -                | -                | -                  |
| P-401 PC1             | 2          | Matrix | Interface of ND3-TMH1, amphipathic helices on NDUFS7 and loops in ND3, NDUFS7 and NDUFA9.                   | -                | -                | -                  |

The phospholipids were assigned on two confidence levels, where 1 is the highest, based on the quality of the density and interactions with nearby residues. Cases in which partial overlap between phospholipids are observed in different structures are indicated with brackets. Interactions of phospholipids with subunits were determined with a 5 Å cut-off.
